# Supplementary material for: Systems biology informed deep learning for inferring parameters and hidden dynamics
Source: PubMed Central journal article supplement (PMC7710119; doi:10.1371/journal.pcbi.1007575), 2020-11-18
Supplement: pcbi.1007575.s003.pdf [file pcbi.1007575.s003.pdf]

### S3 Text. Cell apoptosis model

A system of ODEs describing the activation of  $x_3$  by  $x_1$  is constructed using mass-action kinetics and the known topology of the pathways and is given by Eq. (S5). The parameters of the system are given in S2 Table. The system of ODEs is solved using `odeint` from time  $t = 0$  to  $t = 60$  hours with the initial conditions given as  $\mathbf{x}(0) = [1.34 \times 10^5 \ 1.0 \times 10^5 \ 2.67 \times 10^5 \ 0.0 \ 0.0 \ 0.0 \ x_7^0 \ 0.0]$  (*molecules/cell*), where  $x_7^0 = 2.9 \times 10^3$  leads to cell death and  $x_7^0 = 2.9 \times 10^4$  leads to cell survival. It should be mentioned that a non-dimensional form of the Eq. (S5) is encoded into the neural networks loss function, where the network is trained with non-dimensional observation on  $x_4$ . To non-dimensionalize the data, a timescale of  $t_{scale} = 3600$  s and concentration scale of  $c_{scale} = 1.0 \times 10^5$  *molecules/cell* are used.

The equations defining the cell apoptosis model include eight species and are as follows:

$$\frac{dx_1}{dt} = -k_1x_4x_1 + k_{d1}x_5, \quad (\text{S5a})$$

$$\frac{dx_2}{dt} = k_{d2}x_5 - k_3x_2x_3 + k_{d3}x_6 + k_{d4}x_6, \quad (\text{S5b})$$

$$\frac{dx_3}{dt} = -k_3x_2x_3 + k_{d3}x_6, \quad (\text{S5c})$$

$$\frac{dx_4}{dt} = k_{d4}x_6 - k_1x_4x_1 + k_{d1}x_5 - k_5x_7x_4 + k_{d5}x_8 + k_{d2}x_5, \quad (\text{S5d})$$

$$\frac{dx_5}{dt} = -k_{d2}x_5 + k_1x_4x_1 - k_{d1}x_5, \quad (\text{S5e})$$

$$\frac{dx_6}{dt} = -k_{d4}x_6 + k_3x_2x_3 - k_{d3}x_6, \quad (\text{S5f})$$

$$\frac{dx_7}{dt} = -k_5x_7x_4 + k_{d5}x_8 + k_{d6}x_8, \quad (\text{S5g})$$

$$\frac{dx_8}{dt} = k_5x_7x_4 - k_{d5}x_8 - k_{d6}x_8, \quad (\text{S5h})$$

where the values of the rate constants for the model are taken from [1] and listed in S2 Table.

### References

1. Aldridge BB, Haller G, Sorger PK, Lauffenburger DA. Direct Lyapunov exponent analysis enables parametric study of transient signalling governing cell behaviour. IEE Proceedings-Systems Biology. 2006;153(6):425–432.
