# Supplementary material for: Systems biology informed deep learning for inferring parameters and hidden dynamics
Source: PubMed Central journal article supplement (PMC7710119; doi:10.1371/journal.pcbi.1007575), 2020-11-18
Supplement: pcbi.1007575.s006.pdf [file pcbi.1007575.s006.pdf]

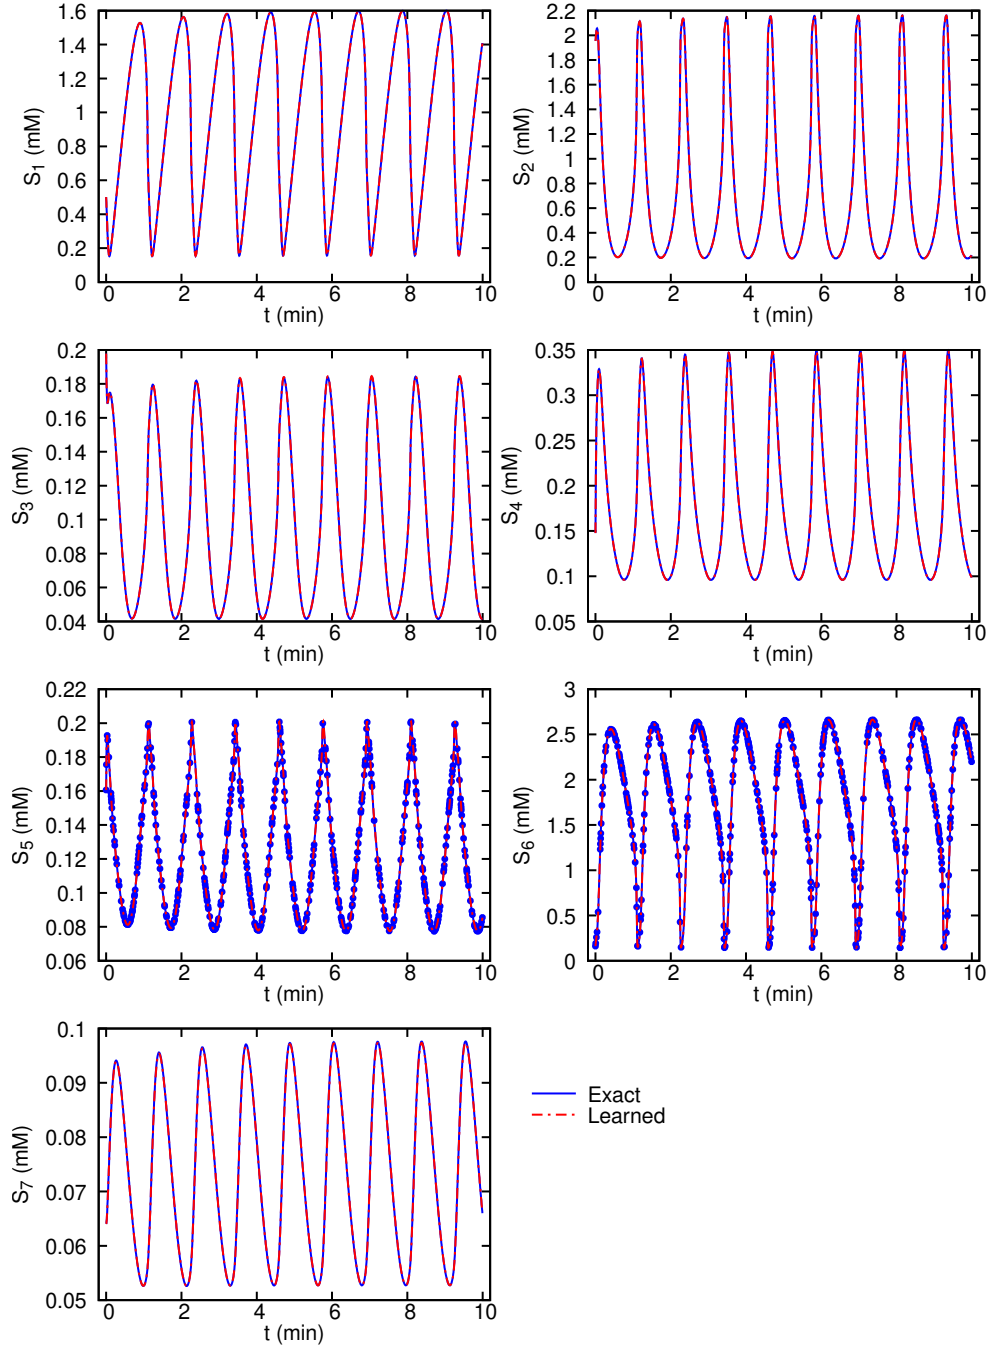

**S2 Fig. Glycolysis oscillator inferred dynamics compared with the exact solution.** Predictions are performed on equally-spaced time instants in the interval of 0 – 10 minutes. The scattered observations are plotted using symbols for the two observables  $S_5$  and  $S_6$ . The exact data and the scattered observations are computed by solving the system of ODEs given in Eq. (S4).
