# Supplementary material for: Systems biology informed deep learning for inferring parameters and hidden dynamics
Source: PubMed Central journal article supplement (PMC7710119; doi:10.1371/journal.pcbi.1007575), 2020-11-18
Supplement: pcbi.1007575.s014.pdf [file pcbi.1007575.s014.pdf]

**S1 Table. Full list of parameters for glycolytic oscillator model [1].**

| Parameter | Nominal value | Unit                       |
|-----------|---------------|----------------------------|
| $J_0$     | 2.5           | $mM \text{ min}^{-1}$      |
| $k_1$     | 100           | $mM^{-1} \text{ min}^{-1}$ |
| $k_2$     | 6             | $mM^{-1} \text{ min}^{-1}$ |
| $k_3$     | 16            | $mM^{-1} \text{ min}^{-1}$ |
| $k_4$     | 100           | $mM^{-1} \text{ min}^{-1}$ |
| $k_5$     | 1.28          | $\text{min}^{-1}$          |
| $k_6$     | 12            | $mM^{-1} \text{ min}^{-1}$ |
| $k$       | 1.8           | $\text{min}^{-1}$          |
| $\kappa$  | 13            | $\text{min}^{-1}$          |
| $q$       | 4             |                            |
| $K_1$     | 0.52          | $mM$                       |
| $\psi$    | 0.1           |                            |
| $N$       | 1             | $mM$                       |
| $A$       | 4             | $mM$                       |

## References

1. Ruoff P, Christensen MK, Wolf J, Heinrich R. Temperature dependency and temperature compensation in a model of yeast glycolytic oscillations. *Biophysical Chemistry*. 2003;106(2):179–192.
