# Supplementary material for: Systems biology informed deep learning for inferring parameters and hidden dynamics
Source: PLOS journal article supplement (doi:10.1371/journal.pcbi.1007575), 2020-11-18
Supplement: S4 (10.1371/journal.pcbi.1007575.s004) [file journal.pcbi.1007575.s004]

## S4 Text. Ultradian endocrine model

The system of equations of the glucose-insulin interaction model is given by Eqs. (S6) and (S7) for which the major parameters include: (i)  $E$ , a rate constant for exchange of insulin between the plasma and remote compartments; (ii)  $I_G$ , the exogenous (externally driven) glucose delivery rate; (iii)  $t_p$ , the time constant for plasma insulin degradation; (iv)  $t_i$ , the time constant for the remote insulin degradation; (v)  $t_d$ , the delay time between plasma insulin and glucose production; (vi)  $V_p$ , the volume of insulin distribution in the plasma; (vii)  $V_i$ , the volume of the remote insulin compartment; (viii)  $V_g$ , the volume of the glucose space [1,2]. Nominal values of the model parameters are given in S3 Table. Further, in Eq. (S7),  $f_1(G)$  represents the rate of insulin production;  $f_2(G)$  represents insulin-independent glucose utilization;  $f_3(I_i)$  represents insulin-dependent glucose utilization;  $f_4(h_3)$  represents delayed insulin-dependent glucose utilization.

$$\frac{dI_p}{dt} = f_1(G) - E\left(\frac{I_p}{V_p} - \frac{I_i}{V_i}\right) - \frac{I_p}{t_p}, \quad (\text{S6a})$$

$$\frac{dI_i}{dt} = E\left(\frac{I_p}{V_p} - \frac{I_i}{V_i}\right) - \frac{I_i}{t_i}, \quad (\text{S6b})$$

$$\frac{dG}{dt} = f_4(h_3) + I_G(t) - f_2(G) - f_3(I_i)G, \quad (\text{S6c})$$

$$\frac{dh_1}{dt} = \frac{1}{t_d}(I_p - h_1), \quad (\text{S6d})$$

$$\frac{dh_2}{dt} = \frac{1}{t_d}(h_1 - h_2), \quad (\text{S6e})$$

$$\frac{dh_3}{dt} = \frac{1}{t_d}(h_2 - h_3), \quad (\text{S6f})$$

where  $f_1 - f_4$  and the nutritional driver of the model  $I_G(t)$  are given by

$$f_1(G) = \frac{R_m}{1 + \exp(\frac{-G}{V_g c_1} + a_1)}, \quad (\text{S7a})$$

$$f_2(G) = U_b \left(1 - \exp(\frac{-G}{C_2 V_g})\right), \quad (\text{S7b})$$

$$f_3(I_i) = \frac{1}{C_3 V_g} \left(U_0 + \frac{U_m}{1 + (\kappa I_i)^{-\beta}}\right), \quad (\text{S7c})$$

$$f_4(h_3) = \frac{R_g}{1 + \exp(\alpha(\frac{h_3}{C_5 V_p} - 1))}, \quad (\text{S7d})$$

$$\kappa = \frac{1}{C_4} \left(\frac{1}{V_i} + \frac{1}{E t_i}\right), \quad (\text{S7e})$$

$$I_G(t) = \sum_{j=1}^N m_j k \exp(k(t_j - t)), \quad (\text{S7f})$$

where  $I_G(t)$  is defined over  $N$  discrete nutrition events [3] with  $k$  as the decay constant and event  $j$  occurs at time  $t_j$  with carbohydrate quantity  $m_j$ .

The nutritional driver of the model is the intake  $I_G(t)$  defined over  $N$  discrete nutritional events given in Eq. (S7)f. To generate the synthetic data for training, the system of ODEs is solved using `odeint` from time  $t = 0$  to  $t = 1800$  *min* with the initial conditions given as  $\mathbf{x}(0) = [12.0 \text{ } (\mu U/ml) \text{ } 4.0 \text{ } (\mu U/ml) \text{ } 110.0 \text{ } (mg/dl) \text{ } 0.0 \text{ } 0.0 \text{ } 0.0]$  and three nutrition events given by  $(t_j, m_j) = [(300, 60) \text{ } (650, 40) \text{ } (1100, 50)] \text{ } (min, g)$  pairs.

## References

1. Sturis J, Polonsky KS, Mosekilde E, Van Cauter E. Computer model for mechanisms underlying ultradian oscillations of insulin and glucose. *American Journal of Physiology-Endocrinology and Metabolism*. 1991;260(5):E801–E809.
2. Albers DJ, Levine M, Gluckman B, Ginsberg H, Hripcsak G, Mamykina L. Personalized glucose forecasting for type 2 diabetes using data assimilation. *PLoS Computational Biology*. 2017;13(4):e1005232.
3. Albers DJ, Elhadad N, Tabak E, Perotte A, Hripcsak G. Dynamical phenotyping: using temporal analysis of clinically collected physiologic data to stratify populations. *PloS one*. 2014;9(6):e96443.
